# Supplementary material for: Multiscale assessment of North American terrestrial carbon balance
Source: Copernicus journal article supplement (doi:10.5194/bg-21-869-2024), 2024-02-16
Supplement: Supplementary file 1 [file bg-21-869-2024-supplement.pdf]

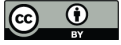

*Supplement of*

## **Multiscale assessment of North American terrestrial carbon balance**

**Kelsey T. Foster et al.**

*Correspondence to:* Kelsey T. Foster (ktfoster@stanford.edu)

The copyright of individual parts of the supplement might differ from the article licence.

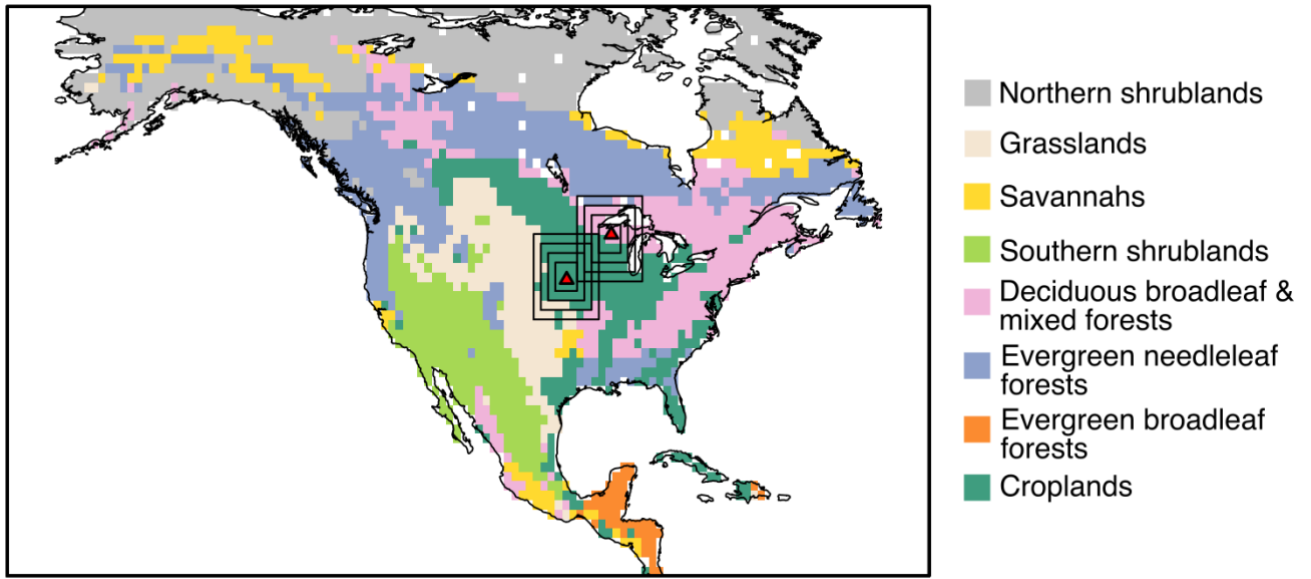

5 **Figure S1: Map of biomes in North America with the locations of two continuous-monitoring towers and outlines visualizing the regions where consistency is evaluated. Red triangles represent locations of towers with high temporal coverage where there are also eddy covariance flux towers nearby. The innermost outlined boxes around each red triangle represents the  $3^\circ \times 3^\circ$  box, centered on the  $1^\circ \times 1^\circ$  grid cell, where consistency is evaluated by determining whether the TBM or inversion ensemble has the smaller standard deviation across all models within each ensemble. The remaining consecutive outlined boxes represent the  $5^\circ \times 5^\circ$ ,  $7^\circ \times 7^\circ$ , and  $9^\circ \times 9^\circ$  scales where consistency is also evaluated.**

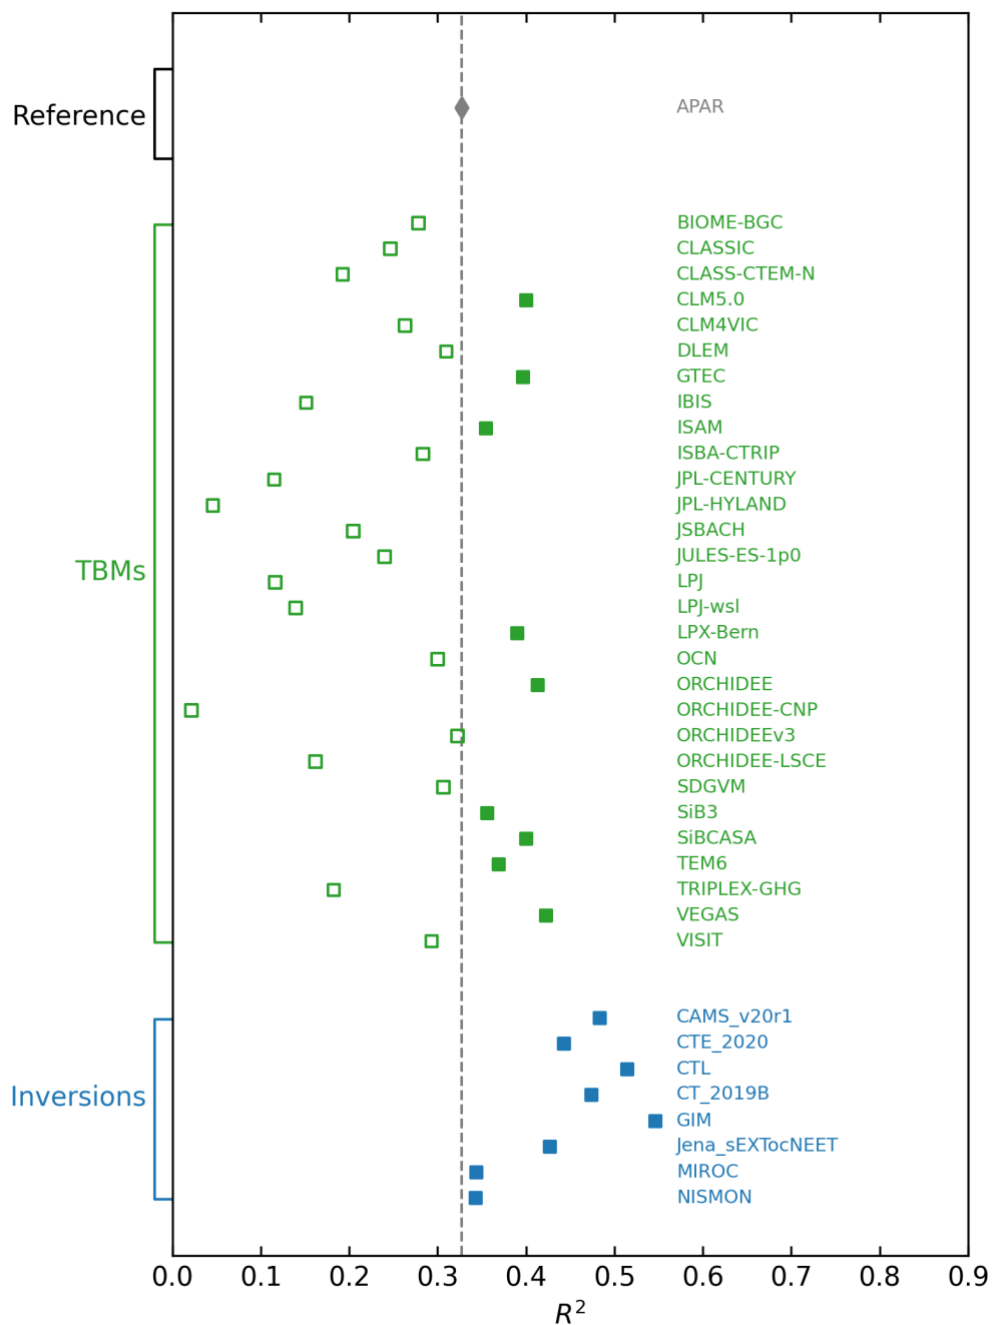

**Figure S2:** The fraction of variance in atmospheric 3-hourly CO<sub>2</sub> explained by monthly mean fluxes ( $R^2$ ). Filled squares represent models with an  $R^2$  greater than APAR's  $R^2$ .

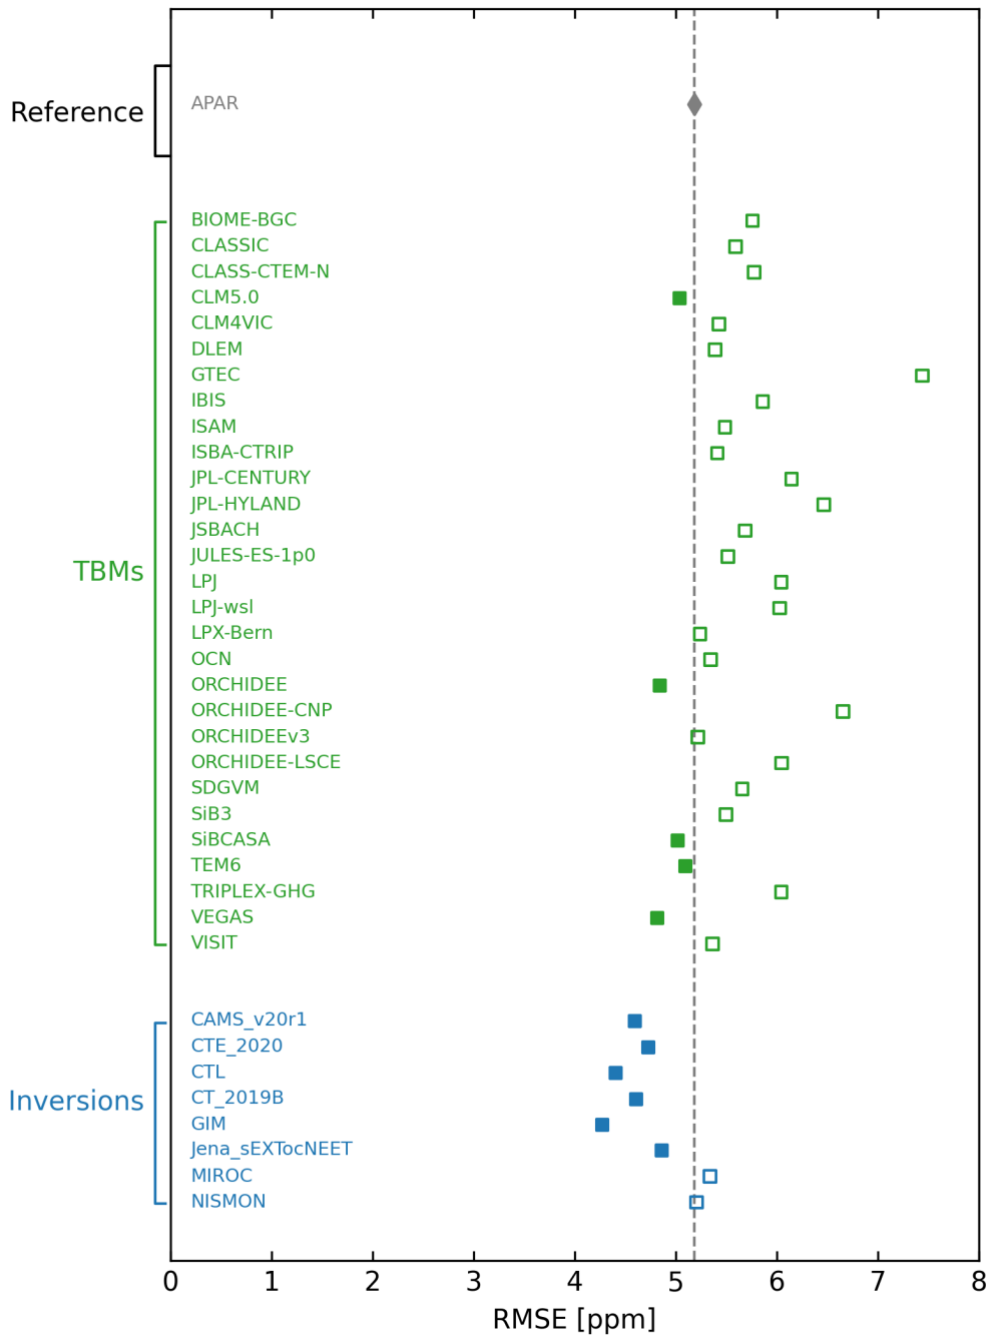

**Figure S3: The root mean squared error (RMSE) between measured atmospheric 3-hourly CO<sub>2</sub> and modeled monthly CO<sub>2</sub> signals. Filled squares represent models that have a smaller RMSE than the RMSE of rescaled APAR.**

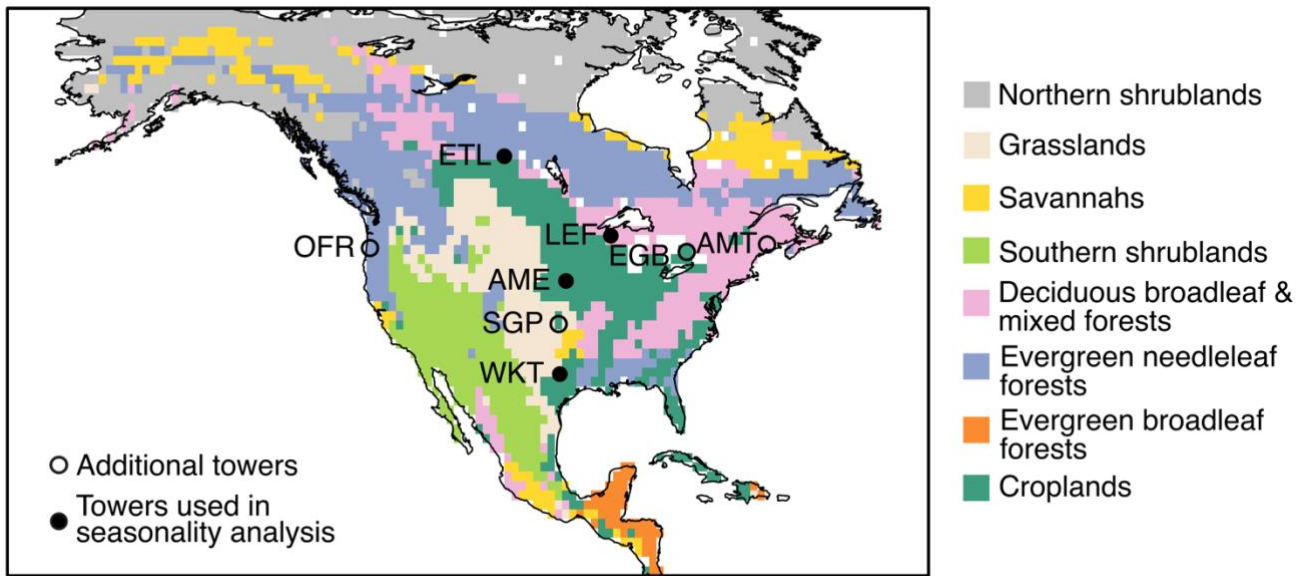

20 **Figure S4: Location of towers used in the seasonality analysis. Towers used in the seasonality analysis are marked with a filled circle. The additional towers that are selected when the tower selection criteria are loosened are marked with empty circles.**

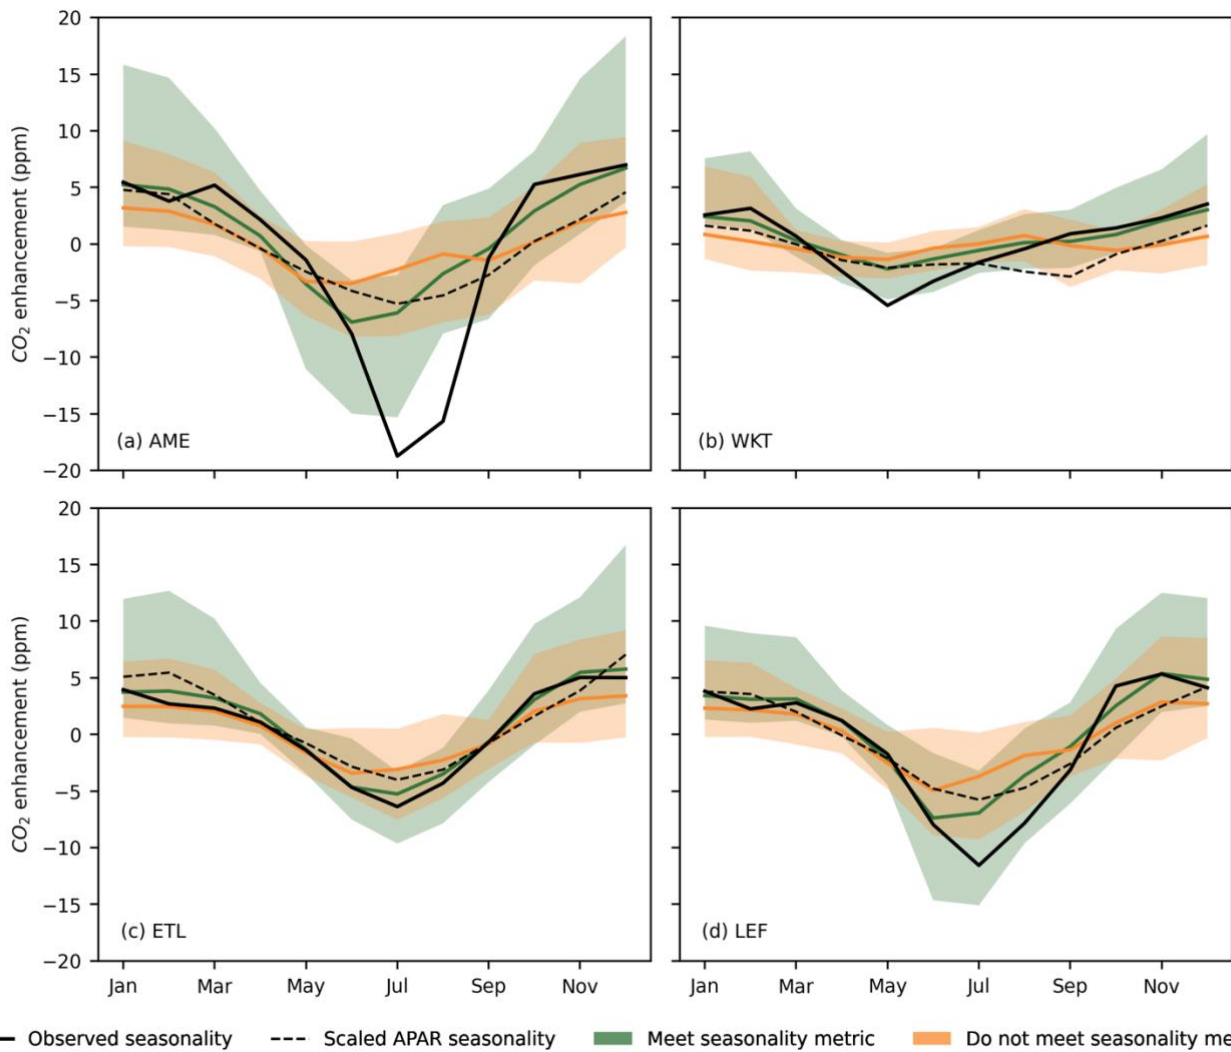

25 **Figure S5: Monthly averaged seasonal cycles of observed CO<sub>2</sub> enhancements and CO<sub>2</sub> enhancements resulting from modeled**  
**carbon fluxes from TBMs. The black line represents the seasonality observed at each tower site and the dotted line is the**  
**seasonality of rescaled APAR (see Sect. 2.3). The green line is the mean of models that meet the seasonality metric (i.e., at least two**  
**of the seasonality sub-metrics) at all four sites and the green shading represents the full range of these estimates. The orange line is**  
 30 **the mean of models that do not meet the seasonality metrics at all four sites and the orange shading represents the full range of**  
**these estimates.**

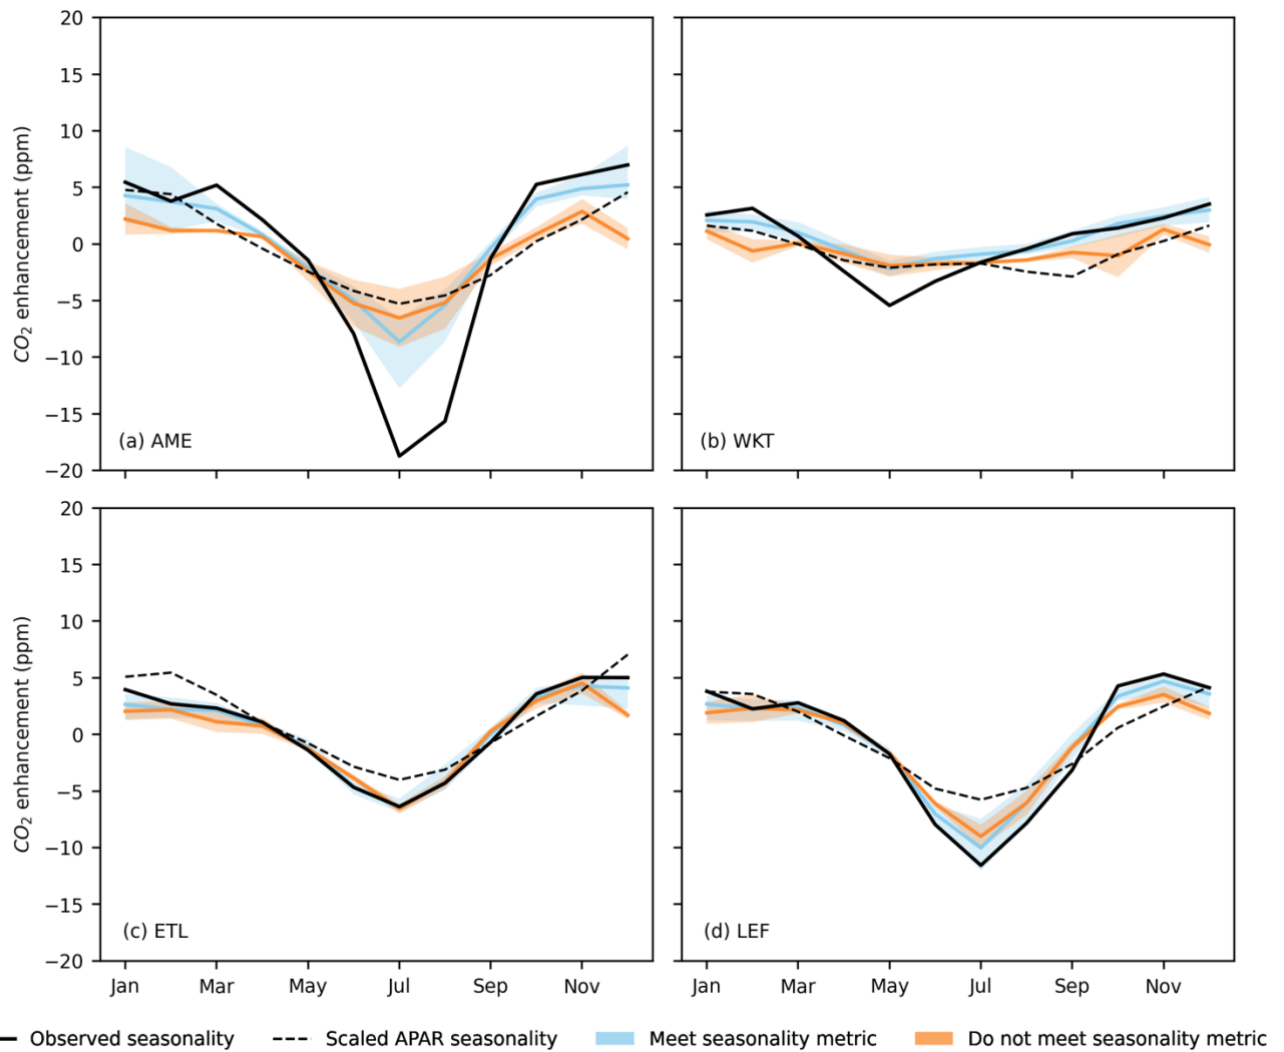

35 **Figure S6: Monthly averaged seasonal cycles of observed CO<sub>2</sub> enhancements and CO<sub>2</sub> enhancements resulting from modeled carbon fluxes from inversions. The black line represents the seasonality observed at each tower site and the dotted line is the seasonality of rescaled APAR (see Sect. 2.3). The blue line is the mean of models that meet the seasonality criteria (i.e., at least two of the seasonality sub-metrics) at all four sites and the blue shading represents the full range of these estimates. The orange line is the mean of models that do not meet the seasonality metrics at all four sites and the orange shading represents the full range of these estimates.**

40

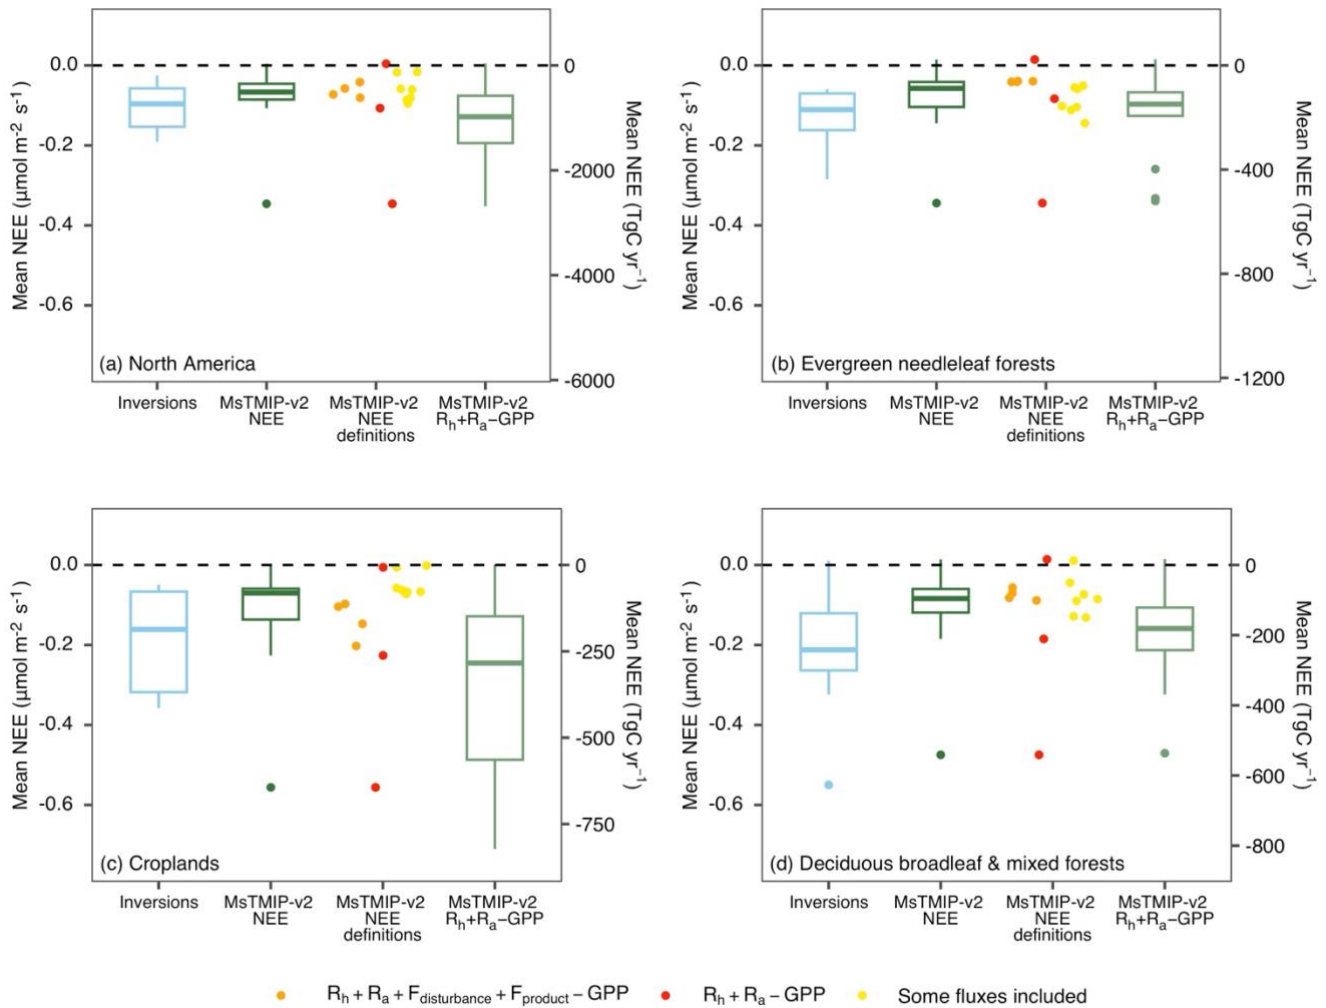

**Figure S7: The impact of using consistent definitions of NEE for MsTMIP-v2 models on ensemble spread and agreement with inversions. The MsTMIP-v2 models are a subset of the full set of TBMs used to evaluate consistency. Only MsTMIP-v2 models are included here because the data needed to do this analysis is provided with the MsTMIP-v2 data. The colored points represent differences in how models define NEE with orange points representing  $NEE = R_h + R_a + F_{disturbance} + F_{product} - GPP$ , red points representing  $NEE = R_h + R_a - GPP$ , and yellow points representing models that include some fluxes from the full definition beyond  $R_h$ ,  $R_a$ , and  $GPP$  (see Sect. 2.1.1), but not all. JPL-CENTURY, JPL-HYLAND, and CLASS-CTEM-N+ were excluded due to missing data or not passing our quality control. CLM, ISAM, and VISIT were included even though they are not included in the TBM superensemble for a more robust analysis.**

45

50



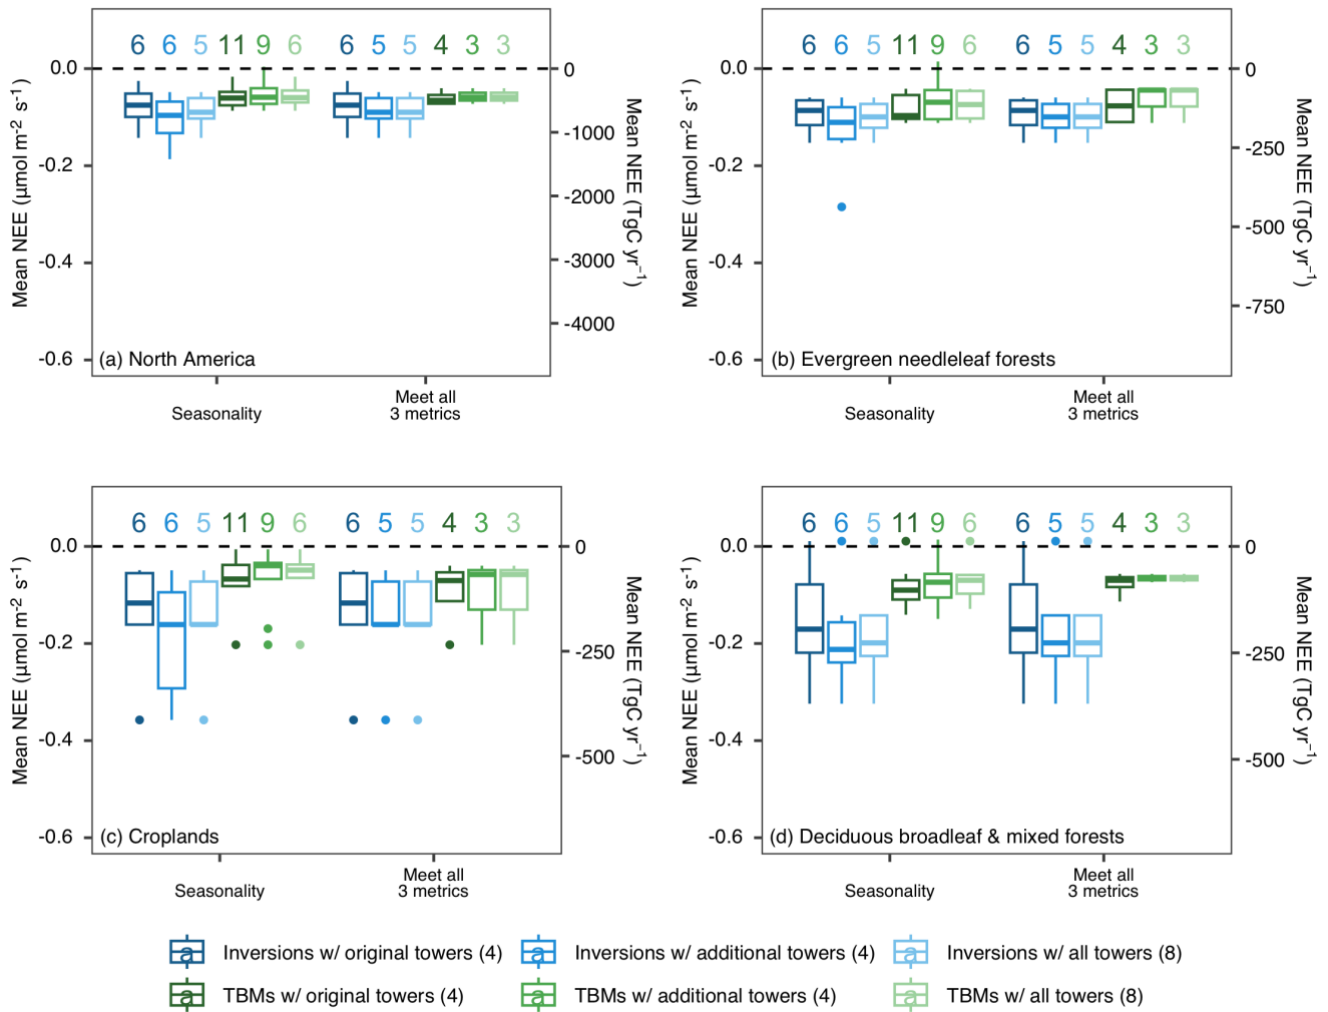

55 **Figure S8: Boxplots showing the impact on consistency and agreement when different towers are used to calculate the seasonality**  
**metrics for North America and the three biomes with largest data availability. Boxplots for inversions are in shades of blue and**  
**boxplots for TBMs are in shades of green. From left to right, the boxplots are ordered as inversions that meet the seasonality**  
**metric when the original four towers are included (AME, WKT, ETL, and LEF), when only the four additional towers are**  
**included (SGP, OFR, AMT, and EGB), and when all eight towers are included (AME, WKT, ETL, LEF, SGP, OFR, AMT, and**  
**EGB). The same ordering applies for TBMs. Numbers above each boxplot indicate the number of models used to create each**  
 60 **boxplot.**

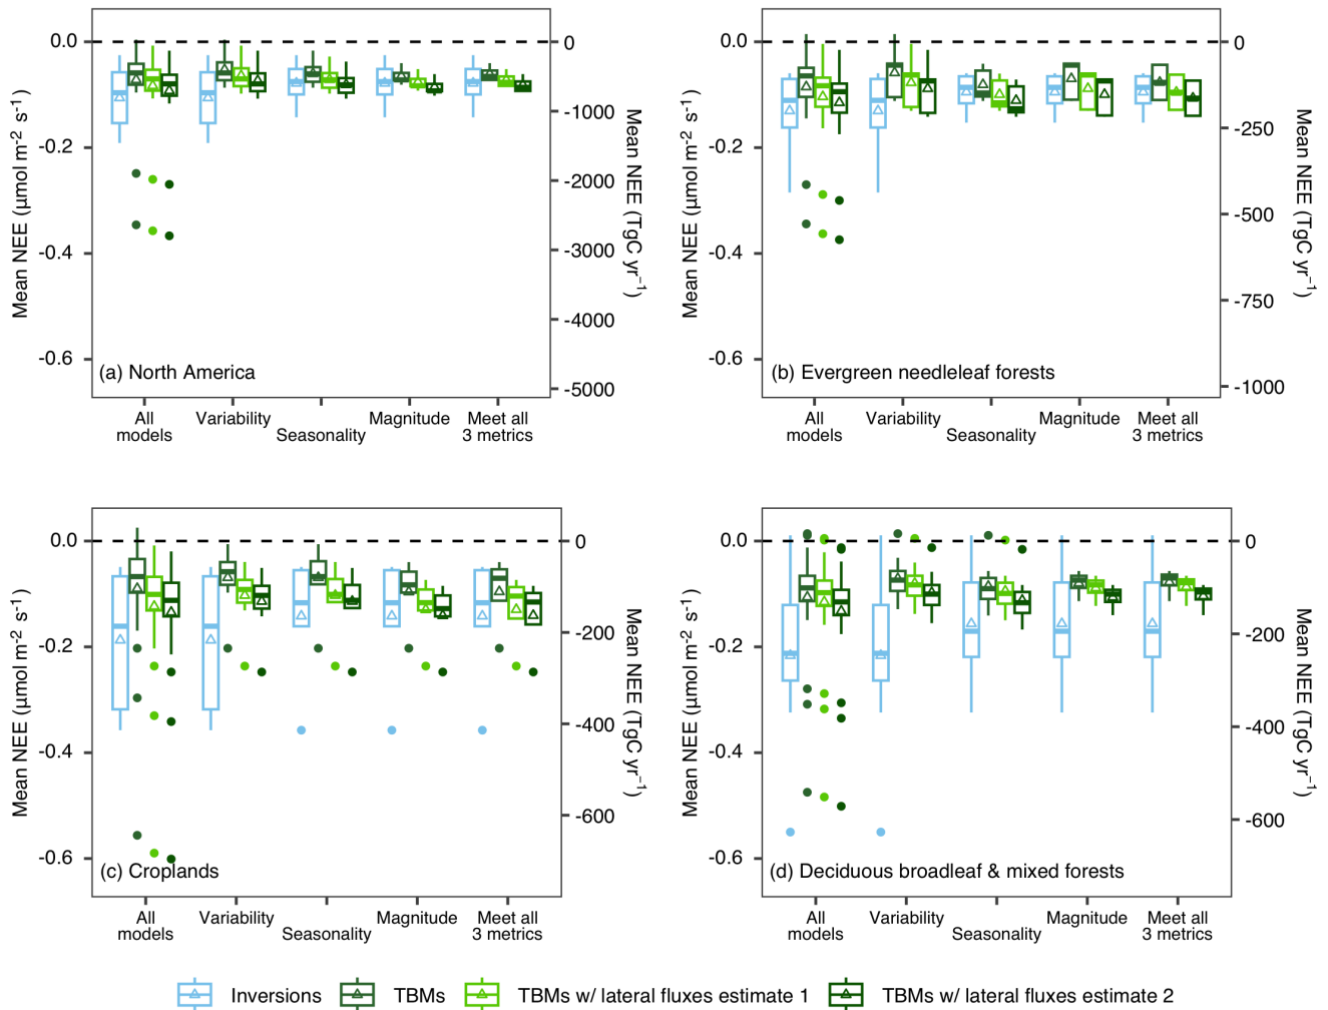

65 **Figure S9: Boxplots showing the agreement between bottom-up and top-down models when lateral fluxes are included. The**  
**boxplots of inverse models are shown in blue and boxplots for TBMs are shown in shades of green. Green boxplots represent**  
**TBMs without the addition of lateral fluxes. Light green boxplots represent TBMs with the addition of gridded lateral fluxes from**  
**Byrne et al., (2022). Dark green boxplots represent TBMs with a second estimate of lateral fluxes added, which was obtained by**  
**scaling the gridded fluxes to the North American regional total in Byrne et al., (2023). The order of the boxplots from left to right**  
**are inversions, TBMs without lateral fluxes added, TBMs with gridded lateral fluxes added, and TBMs with gridded lateral fluxes**  
70 **scaled to the North American regional total added.**

**Table S1: Tower sites for atmospheric CO<sub>2</sub> observations from ObsPack CO<sub>2</sub> GLOBALVIEWplus v3.2.**

| <b>Site Name</b> | <b>Site Location</b>                              | <b>Latitude</b> | <b>Longitude</b> | <b>Height (m)</b> | <b>Principal Investigators</b>                       |
|------------------|---------------------------------------------------|-----------------|------------------|-------------------|------------------------------------------------------|
| AAC              | Austin Cary Memorial Forest, Gainesville, FL, USA | 29.7381         | -82.2188         | 32                | Natasha Miles, Scott Richardson, and Ken Davis (PSU) |
| ACR              | Chestnut Ridge, TX, USA                           | 35.9311         | -84.3324         | 61                | Natasha Miles, Scott Richardson, and Ken Davis (PSU) |
| ACV              | Canaan Valley, WV, USA                            | 39.119          | -79.4523         | 7                 | Natasha Miles, Scott Richardson, and Ken Davis (PSU) |
| AME              | Mead, NE, USA                                     | 41.1649         | -96.4701         | 4.5               | Natasha Miles, Scott Richardson, and Ken Davis (PSU) |
| AMT              | Argyle, ME, USA                                   | 45.0346         | -68.6821         | 107               | Arlyn Andrews (NOAA)                                 |
| AOZ              | Ozark, MO, USA                                    | 38.7441         | -92.2            | 30                | Natasha Miles, Scott Richardson, and Ken Davis (PSU) |
| BAO              | Boulder Atmospheric Observatory, CO, USA          | 40.05           | -105.004         | 300               | Arlyn Andrews (NOAA)                                 |
| BCK              | Behchoko, NT, Canada                              | 62.7979         | -115.918         | 60                | Doug Worthy (EC)                                     |
| BRA              | Bratt's Lake, SK, Canada                          | 50.2016         | -104.711         | 35                | Doug Worthy (EC)                                     |
| BRW              | Barrow Atmospheric Baseline Observatory, AK, USA  | 71.323          | -156.6114        | 16.46             | Kirk Thoning and Pieter Tans (NOAA)                  |
| CDL              | Candle Lake, SK, Canada                           | 53.9871         | -105.1179        | 30                | Doug Worthy (EC)                                     |
| CHM              | Chibougamau, QC, Canada                           | 49.6925         | -74.3423         | 30                | Doug Worthy (EC)                                     |
| EGB              | Egbert, ON, Canada                                | 44.231          | -79.7838         | 3                 | Doug Worthy (EC)                                     |
| ESP              | Estevan Point, BC, Canada                         | 49.3829         | -126.544         | 40                | Doug Worthy (EC)                                     |
| EST              | Esther, AB, Canada                                | 51.67           | -110.206         | 3                 | Doug Worthy (EC)                                     |
| ETL              | East Trout Lake, SK, Canada                       | 54.3537         | -104.987         | 105               | Doug Worthy (EC)                                     |
| FPK              | Fort Peck, MT, USA                                | 48.3079         | -105.1017        | 3                 | Natasha Miles, Scott Richardson, and Ken Davis (PSU) |
| FSD              | Fraserdale, ON, Canada                            | 49.8752         | -81.5698         | 40                | Doug Worthy (EC)                                     |

|      |                                                 |         |           |      |                                                             |
|------|-------------------------------------------------|---------|-----------|------|-------------------------------------------------------------|
| HDP  | Hidden Peak, UT, USA                            | 40.56   | -111.65   | 17.7 | Britton Stephens (NCAR)                                     |
| HFM  | Harvard Forest, MA, USA                         | 42.5378 | -72.1714  | 29   | Steve Wofsy and Bill Munger (Harvard)                       |
| KCMP | Rosemount Research and Outreach Center, MN, USA | 44.6886 | -93.0728  | 200  | Tim Griffis (UMN)                                           |
| LEF  | Park Falls, WI, USA                             | 45.9453 | -90.2744  | 396  | Arlyn Andrews (NOAA)                                        |
| LLB  | Lac La Biche, AB, Canada                        | 54.9538 | -112.467  | 10   | Doug Worthy (EC)                                            |
| MVY  | Martha's Vineyard, MA, USA                      | 41.325  | -70.5667  | 10   | Colm Sweeney (NOAA)                                         |
| NWR  | Niwot Ridge, CO, USA                            | 40.0531 | -105.5864 | 5.1  | Britton Stephens (NCAR)                                     |
| OFR  | Fir, OR, USA                                    | 44.6465 | -123.5514 | 38   | Beverly Law (Oregon State) and Andres Schmidt (RWTH Aachen) |
| OMP  | Mary's Peak, OR, USA                            | 44.5043 | -123.553  | 10   | Beverly Law (Oregon State) and Andres Schmidt (RWTH Aachen) |
| OMT  | Meolius, OR, USA                                | 44.4524 | -121.5572 | 33   | Beverly Law (Oregon State) and Andres Schmidt (RWTH Aachen) |
| ONG  | Burns, OR, USA                                  | 43.4704 | -119.691  | 6    | Beverly Law (Oregon State) and Andres Schmidt (RWTH Aachen) |
| OYQ  | Yaquina Head, OR, USA                           | 44.675  | -124.067  | 12   | Beverly Law (Oregon State) and Andres Schmidt (RWTH Aachen) |
| RBA  | Roof Butte, AZ                                  | 36.4614 | -109.0956 | 21.9 | Britton Stephens (NCAR)                                     |
| RCE  | Centerville, IA, USA                            | 40.7919 | -92.8775  | 110  | Natasha Miles, Scott Richardson, and Ken Davis (PSU)        |
| RGV  | Galesville, WI, USA                             | 44.091  | -91.3382  | 140  | Natasha Miles, Scott Richardson, and Ken Davis (PSU)        |
| RKW  | Kewanee, IL, USA                                | 41.2762 | -89.9724  | 140  | Natasha Miles, Scott Richardson, and Ken Davis (PSU)        |
| RMM  | Mead, NE, USA                                   | 41.1386 | -96.4559  | 120  | Natasha Miles, Scott Richardson, and Ken Davis (PSU)        |
| RRL  | Round Lake, MN, USA                             | 43.5263 | -95.4137  | 110  | Natasha Miles, Scott Richardson, and Ken Davis (PSU)        |
| SCT  | Beech Island, SC, USA                           | 33.4057 | -81.8334  | 305  | Arlyn Andrews (NOAA) and Matt                               |

|     |                                   |         |           |     |                                                  |
|-----|-----------------------------------|---------|-----------|-----|--------------------------------------------------|
|     |                                   |         |           |     | Parker (SRNL)                                    |
| SGP | Southern Great Plains, OK, USA    | 36.607  | -97.489   | 60  | Sebastien Biraud and Margaret Torn (LBNL)        |
| SNP | Shenandoah National Park, VA, USA | 38.617  | -78.35    | 17  | Arlyn Andrews (NOAA) and Stephan De Wekker (UVA) |
| SPL | Storm Peak Laboratory, CO, USA    | 40.45   | -106.73   | 9.1 | Britton Stephens (NCAR)                          |
| WBI | West Branch, IA, USA              | 41.7248 | -91.3529  | 379 | Arlyn Andrews (NOAA)                             |
| WGC | Walnut Grove, CA, USA             | 38.265  | -121.4911 | 483 | Arlyn Andrews (NOAA) and Marc Fischer (LBNL)     |
| WKT | Moody, TX, USA                    | 31.3149 | -97.3269  | 457 | Arlyn Andrews (NOAA)                             |
| WSA | Sable Island, NS, Canada          | 43.9323 | -60.0126  | 25  | Doug Worthy (EC)                                 |
